# Supplementary material for: Surface tension effects on the phase transition of a DPPC bilayer with and without protein: a molecular dynamics simulation
Source: Royal Society of Chemistry journal article supplement (doi:10.1039/c3cp55524k), 2014-01-01
Supplement: c3cp55524k1.pdf [file c3cp55524k1.pdf]

## Electronic Supplementary Information

# Surface tension effects on the phase transition of a DPPC bilayer with and without protein: A molecular dynamics simulation†

Xian Kong<sup>a</sup>, Shanshan Qin<sup>b</sup>, Diannan Lu<sup>\*a</sup>, Zheng Liu<sup>\*a</sup>

<sup>a</sup> Department of Chemical Engineering, Tsinghua University, Beijing, 100084, China.

E-mail: \*[ludiannan@tsinghua.edu.cn](mailto:ludiannan@tsinghua.edu.cn); [liuzheng@mail.tsinghua.edu.cn](mailto:liuzheng@mail.tsinghua.edu.cn).

<sup>b</sup> Key Laboratory of Bioorganic Phosphorous Chemistry and Chemical Biology (Ministry of Education), Department of Chemistry, Tsinghua University, Beijing 100084, P. R. China.

### Simulated annealing simulations

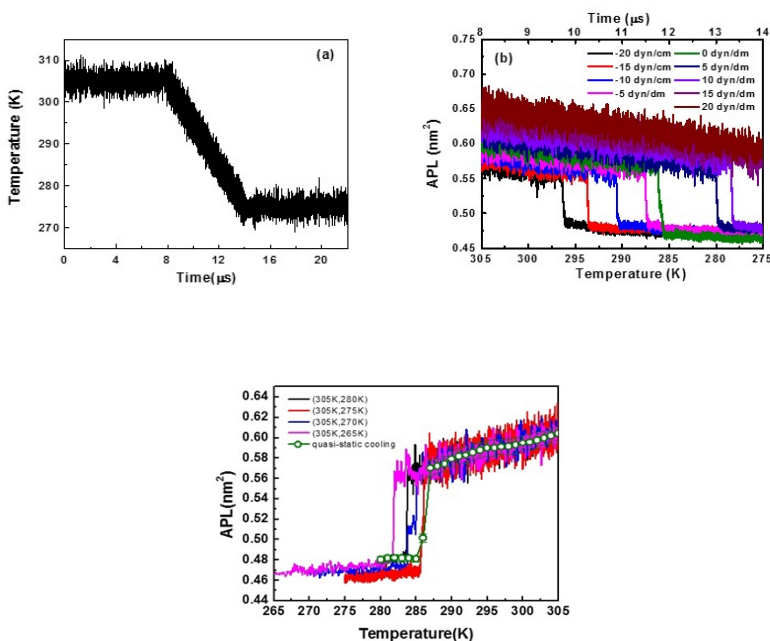

**Fig. S1** Simulated annealing simulations were run to determine the range of temperature and surface tension among which the phase transition may occur. During a simulated annealing simulation, the system was first equilibrated for 8  $\mu$ s under a higher temperature (305 K), at which the bilayer was in a liquid crystal phase. Then the coupling temperature was linearly reduced to 275 K within 6  $\mu$ s to bring the lipid bilayer into a gel phase. Temperature change during a typical simulated annealing is shown in (a). (b) gives the change of area per lipid (APL) during the annealing period. (c) gives a comparison of simulated annealing with different cooling speed and with the “quasi-static” cooling method proposed by Rodgers JM *et al* (ref 21 in main text). This shows the simulated annealing is capable of determining temperature range for the phase transition.

## Summary for Equilibrium Simulations

Table S1 Simulation summary

|                                            | <b>DPPC bilayer</b>                     | <b>AqpZ embedded DPPC bilayer</b> |
|--------------------------------------------|-----------------------------------------|-----------------------------------|
| <b>DPPC beads number</b>                   | 216                                     | 160                               |
| <b>W beads number</b>                      | 3778                                    | 3759                              |
| <b>AqpZ beads number</b>                   | 0                                       | 474                               |
|                                            | 6370                                    | 6153                              |
| <b>Considered Temperatures (K)</b>         | 275,280,285,290,295,300,305             |                                   |
| <b>Considered Surface tension (dyn/cm)</b> | ±50, ±40, ±30, ±25,±20, ±15, ±10, ±5, 0 |                                   |

## RMSD of Protein

Table S2 RMSD of Protein backbone beads at temperature 290K

| <b>Surface tension (dyn/cm)</b> | <b>RMSD (nm)</b> | <b>Standard deviation(nm)</b> |
|---------------------------------|------------------|-------------------------------|
| -50                             | 0.21             | 0.02                          |
| -10                             | 0.20             | 0.02                          |
| 0                               | 0.22             | 0.02                          |
| 10                              | 0.23             | 0.02                          |
| 50                              | 0.21             | 0.02                          |
